# Supplementary material for: Melt polycondensation of 2,5-tetrahydrofurandimethanol with various dicarboxylic acids towards a variety of biobased polyesters
Source: Royal Society of Chemistry journal article supplement (doi:10.1039/d2py00975g), 2022-01-01
Supplement: d2py00975g1.pdf [file d2py00975g1.pdf]

## Supplementary information

### Melt polycondensation of 2,5-tetrahydrofurandimethanol with various dicarboxylic acids towards a variety of biobased polyesters

Chenhao Jin<sup>a</sup>, Lipeng Liu<sup>a</sup>, Zhu Tu<sup>a</sup>, Bo Wang<sup>b</sup>, Pei Wang<sup>c</sup>, Zhiyong Wei<sup>a,\*</sup>

<sup>a</sup> Department of Polymer Science and Engineering, School of Chemical Engineering, Dalian University of Technology, Dalian 116024, China

<sup>b</sup> School of Materials Science and Engineering, Dalian University of Technology, Dalian 116024, China

<sup>c</sup> College of Transportation Engineering, Dalian Maritime University, Dalian 116024, China

\*Corresponding author, E-mail address: zywei@dlut.edu.cn (Z. Wei).

**Table S1** Feeding amount of diols reacting with FDCA

| Diols | Molar (mol) |       | Mass (g) |       | TBT (g) |
|-------|-------------|-------|----------|-------|---------|
|       | Diols       | FDCA  | Diols    | FDCA  |         |
| EG    | 0.400       | 0.004 | 24.819   | 0.624 | 0.0136  |
| DEG   | 0.400       | 0.004 | 42.448   | 0.624 | 0.0136  |
| BDO   | 0.400       | 0.004 | 36.048   | 0.624 | 0.0136  |
| ODO   | 0.400       | 0.004 | 58.492   | 0.624 | 0.0136  |
| THFDM | 0.400       | 0.004 | 52.832   | 0.624 | 0.0136  |
| CHDM  | 0.400       | 0.004 | 57.684   | 0.624 | 0.0136  |

**Table S2** Feeding amount of DEG-based and THFDM-based homopolymers

| Samples   | Diacids | Molar (mol) |       | Mass (g) |        | TBT (g) |
|-----------|---------|-------------|-------|----------|--------|---------|
|           |         | Diacids     | Diols | Diacids  | Diols  |         |
| DEG based | SA      | 0.6         | 0.96  | 70.85    | 101.88 | 0.68    |

|                              |      |     |      |       |        |      |
|------------------------------|------|-----|------|-------|--------|------|
| polyesters                   | AA   | 0.6 | 0.96 | 87.68 | 101.88 | 0.68 |
|                              | PTA  | 0.6 | 0.96 | 99.68 | 101.88 | 0.68 |
|                              | FDCA | 0.6 | 0.96 | 93.65 | 101.88 | 0.68 |
| THFDM<br>based<br>polyesters | SA   | 0.6 | 0.96 | 70.85 | 126.82 | 0.68 |
|                              | AA   | 0.6 | 0.96 | 87.68 | 126.82 | 0.68 |
|                              | PTA  | 0.6 | 0.96 | 99.68 | 126.82 | 0.68 |
|                              | FDCA | 0.6 | 0.96 | 93.65 | 126.82 | 0.68 |

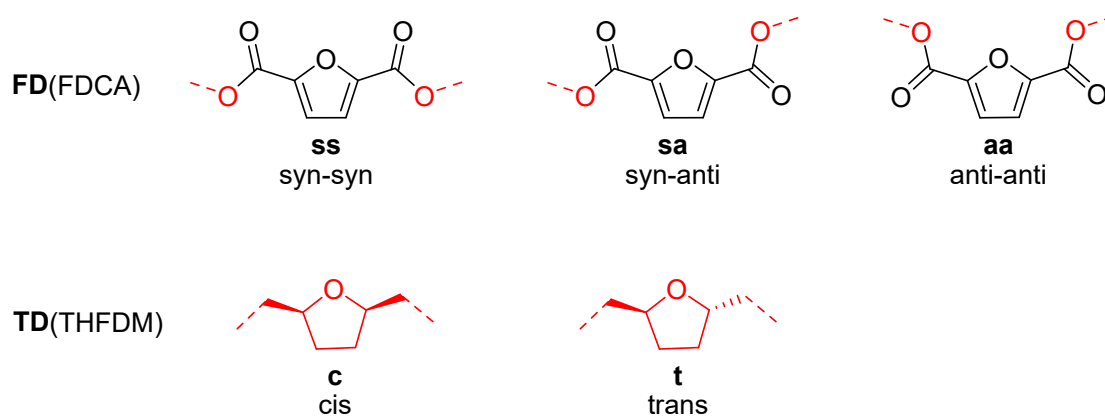

**Figure S1.** Possible conformations for subunit FDCA (FD) and configurations for THFDM (TD)

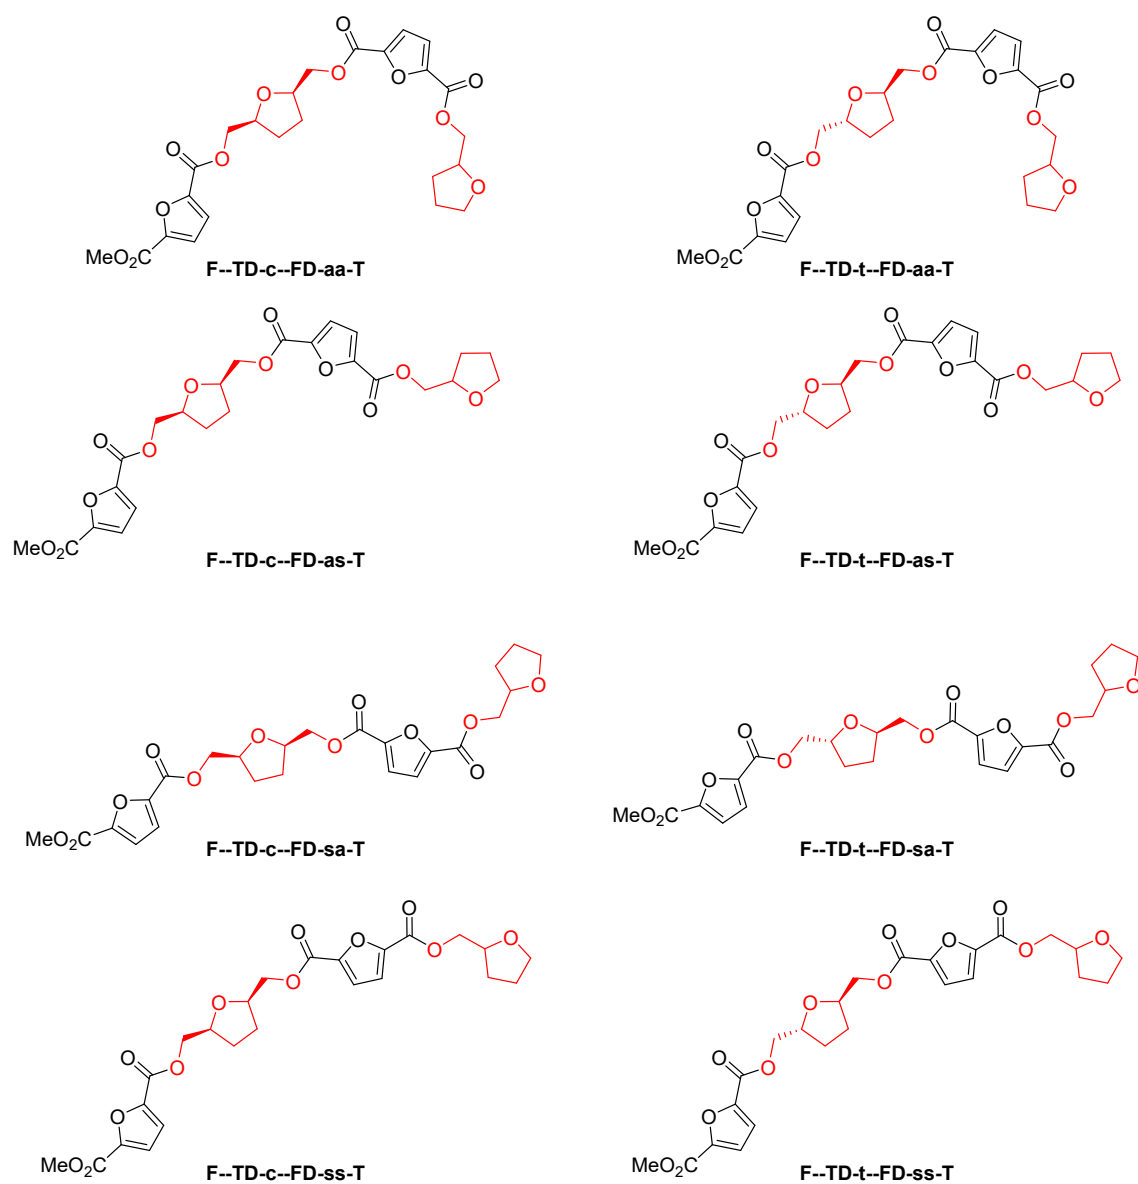

**Figure S2.** Eight possible combinations for FD and TD subunit in the simplified model used in the following calculations

**Table S3** The most stable 5 conformations of the simplified polymer model

| Entry              | Relative electronic energy (kcal/mol) | Relative Gibbs free energy (kcal/mol) | Absolute electronic energy (Hartree) | Absolute Gibbs free energy (Hartree) |
|--------------------|---------------------------------------|---------------------------------------|--------------------------------------|--------------------------------------|
| F--TD-c--FD-aa-T-1 | -1.1                                  | <i>0.3</i>                            | -1833.401088                         | -1832.991460                         |
| F--TD-c--FD-aa-T-2 | -0.4                                  | <i>1.0</i>                            | -1833.400033                         | -1832.990367                         |
| F--TD-c--FD-aa-T-3 | -1.9                                  | <i>1.0</i>                            | -1833.402338                         | -1832.990351                         |
| F--TD-c--FD-aa-T-4 | -1.8                                  | <i>1.3</i>                            | -1833.402159                         | -1832.989955                         |
| F--TD-c--FD-aa-T-5 | -1.3                                  | <i>1.4</i>                            | -1833.401334                         | -1832.989675                         |
| F--TD-c--FD-as-T-1 | -0.3                                  | <i>0.8</i>                            | -1833.399774                         | -1832.990668                         |
| F--TD-c--FD-as-T-2 | -0.6                                  | <i>0.9</i>                            | -1833.400267                         | -1832.990499                         |
| F--TD-c--FD-as-T-3 | -1.2                                  | <i>2.0</i>                            | -1833.401275                         | -1832.988820                         |
| F--TD-c--FD-as-T-4 | -1.3                                  | <i>2.2</i>                            | -1833.401347                         | -1832.988395                         |
| F--TD-c--FD-as-T-5 | 0.2                                   | <i>3.0</i>                            | -1833.399033                         | -1832.987201                         |
| F--TD-c--FD-sa-T-1 | -1.6                                  | <i>1.3</i>                            | -1833.401817                         | -1832.989935                         |
| F--TD-c--FD-sa-T-2 | -0.5                                  | <i>1.7</i>                            | -1833.400088                         | -1832.989245                         |
| F--TD-c--FD-sa-T-3 | -0.9                                  | <i>1.7</i>                            | -1833.400715                         | -1832.989219                         |
| F--TD-c--FD-sa-T-4 | -0.7                                  | <i>2.3</i>                            | -1833.400452                         | -1832.988302                         |
| F--TD-c--FD-sa-T-5 | -0.2                                  | <i>2.5</i>                            | -1833.399614                         | -1832.987941                         |
| F--TD-c--FD-ss-T-1 | 1.0                                   | <i>1.4</i>                            | -1833.397765                         | -1832.989733                         |
| F--TD-c--FD-ss-T-2 | -0.8                                  | <i>2.2</i>                            | -1833.400574                         | -1832.988547                         |
| F--TD-c--FD-ss-T-3 | -1.6                                  | <i>3.0</i>                            | -1833.401902                         | -1832.987182                         |
| F--TD-c--FD-ss-T-4 | 1.2                                   | <i>3.2</i>                            | -1833.397383                         | -1832.986935                         |
| F--TD-c--FD-ss-T-5 | 0.9                                   | <i>3.3</i>                            | -1833.397898                         | -1832.986726                         |
| F--TD-t--FD-aa-T-1 | 0.0                                   | <i>1.4</i>                            | -1833.399376                         | -1832.989770                         |
| F--TD-t--FD-aa-T-2 | -0.1                                  | <i>1.4</i>                            | -1833.399568                         | -1832.989725                         |
| F--TD-t--FD-aa-T-3 | -0.3                                  | <i>1.9</i>                            | -1833.399850                         | -1832.988959                         |
| F--TD-t--FD-aa-T-4 | -1.9                                  | <i>2.1</i>                            | -1833.402308                         | -1832.988560                         |
| F--TD-t--FD-aa-T-5 | 0.0                                   | <i>2.4</i>                            | -1833.399363                         | -1832.988229                         |
| F--TD-t--FD-as-T-1 | -1.4                                  | <i>0.4</i>                            | -1833.401517                         | -1832.991414                         |
| F--TD-t--FD-as-T-2 | -1.2                                  | <i>0.9</i>                            | -1833.401207                         | -1832.990477                         |
| F--TD-t--FD-as-T-3 | -1.2                                  | <i>0.9</i>                            | -1833.401207                         | -1832.990472                         |
| F--TD-t--FD-as-T-4 | -1.6                                  | <i>1.3</i>                            | -1833.401960                         | -1832.989971                         |
| F--TD-t--FD-as-T-5 | 1.3                                   | <i>2.5</i>                            | -1833.397194                         | -1832.987962                         |
| F--TD-t--FD-sa-T-1 | 0.0                                   | <i>0.0</i>                            | -1833.399331                         | -1832.991978                         |
| F--TD-t--FD-sa-T-2 | -0.6                                  | <i>0.7</i>                            | -1833.400326                         | -1832.990880                         |
| F--TD-t--FD-sa-T-3 | -0.6                                  | <i>1.6</i>                            | -1833.400317                         | -1832.989480                         |
| F--TD-t--FD-sa-T-4 | 0.1                                   | <i>2.0</i>                            | -1833.399126                         | -1832.988785                         |
| F--TD-t--FD-sa-T-5 | 0.7                                   | <i>2.0</i>                            | -1833.398169                         | -1832.988715                         |
| F--TD-t--FD-ss-T-1 | 1.6                                   | <i>3.2</i>                            | -1833.396799                         | -1832.986920                         |
| F--TD-t--FD-ss-T-2 | -1.0                                  | <i>3.2</i>                            | -1833.400969                         | -1832.986874                         |
| F--TD-t--FD-ss-T-3 | -1.0                                  | <i>3.2</i>                            | -1833.400969                         | -1832.986869                         |
| F--TD-t--FD-ss-T-4 | 2.4                                   | <i>3.6</i>                            | -1833.395574                         | -1832.986229                         |
| F--TD-t--FD-ss-T-5 | 2.6                                   | <i>3.8</i>                            | -1833.395142                         | -1832.985975                         |
